# Supplementary material for: Glutaredoxin 1 mediates the protective effect of steady laminar flow on endothelial cells against oxidative stress-induced apoptosis via inhibiting Bim
Source: PubMed Central journal article supplement (PMC5686153; doi:10.1038/s41598-017-15672-3), 2017-11-14

## **Glutaredoxin 1 mediates the protective effect of steady laminar flow on endothelial cells against oxidative stress-induced apoptosis via inhibiting Bim**

Yao Li<sup>a,1</sup>, Meng Ren<sup>a,1</sup>, Xiaoqun Wang<sup>b,1</sup>, Xingxing Cui<sup>a</sup>, Hongmei Zhao<sup>a</sup>, Chuanrong Zhao<sup>c</sup>, Jing Zhou<sup>c</sup>, Yanan Guo<sup>d</sup>, Yi Hu<sup>e,\*</sup>, Chen Yan<sup>d</sup>, Bradford Berk<sup>d</sup>, Jing Wang<sup>a,\*</sup>

<sup>a</sup> *State Key Laboratory of Medical Molecular Biology, Institute of Basic Medical Sciences, Chinese Academy of Medical Sciences, Department of Pathophysiology, Peking Union Medical College, Tsinghua University, Beijing 100005, China*

<sup>b</sup> *Department of Cardiology, Ruijin Hospital, Shanghai Jiao-Tong University school of medicine, Shanghai, 200025, China*

<sup>c</sup> *Department of Physiology and Pathophysiology, School of Basic Medical Sciences, Peking University, Beijing, China; Key Laboratory of Molecular Cardiovascular Science, Ministry of Education, Beijing, China*

<sup>d</sup> *Aab Cardiovascular Research Institute, School of Medicine and Dentistry, University of Rochester, Rochester, NY 14642, USA*

<sup>e</sup> *CAS Key Laboratory for Biomedical Effects of Nanomaterials and Nanosafety, Multi-disciplinary Research Division, Institute of High Energy Physics, Chinese Academy of Sciences (CAS), Beijing 100049, China*

<sup>1</sup> These authors contributed equally to this work.

\*Corresponding author

E-mail addresses: [huyi@ihep.ac.cn](mailto:huyi@ihep.ac.cn) (Y. Hu), [wangjing@ibms.pumc.edu.cn](mailto:wangjing@ibms.pumc.edu.cn) (J. Wang).

Figure 2A

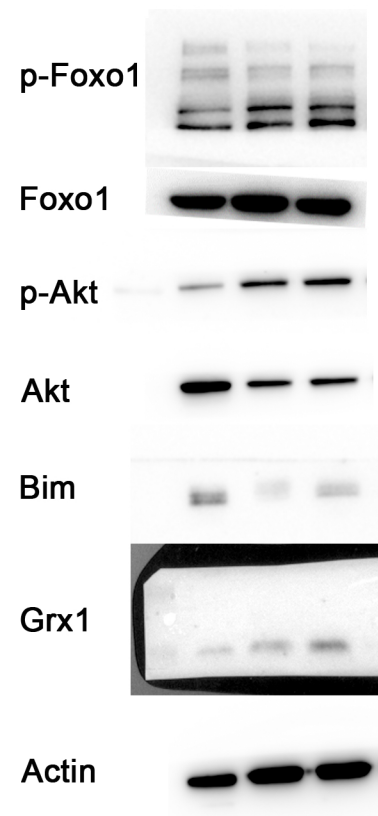

Figure 2B

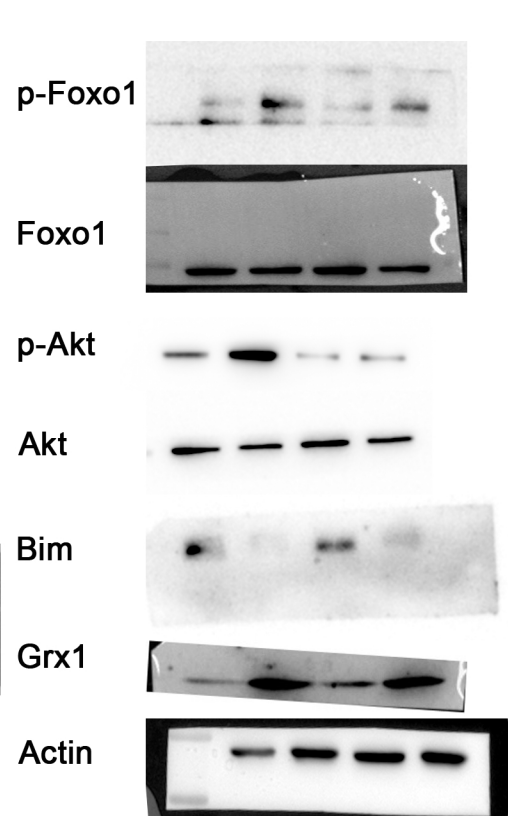

Figure 2C

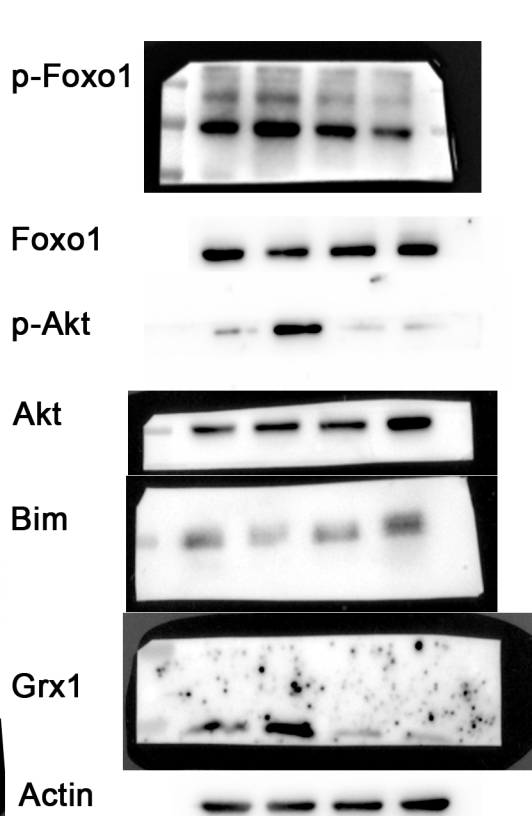

Figure 3B

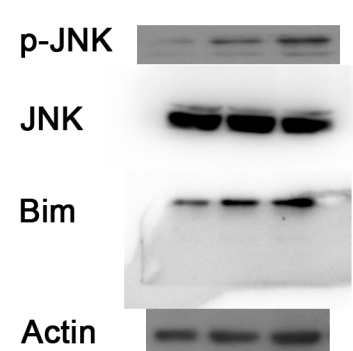

Figure 3C

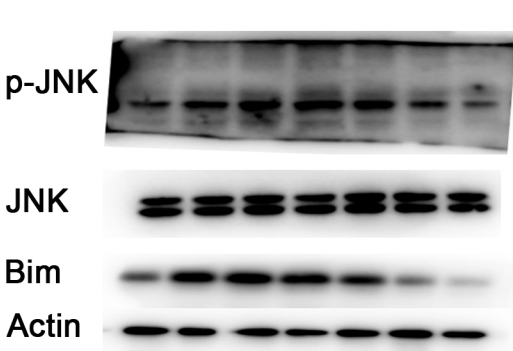

Figure 3D

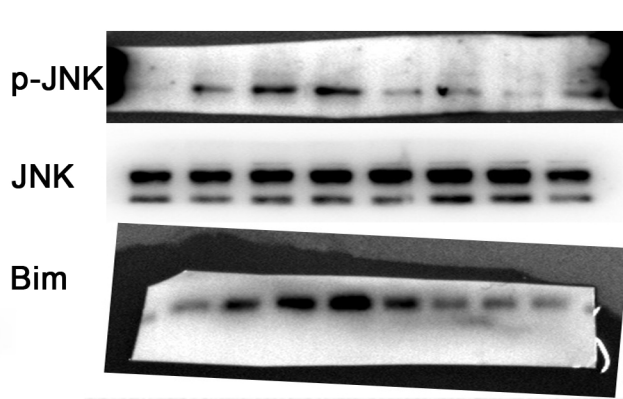

Figure 4A

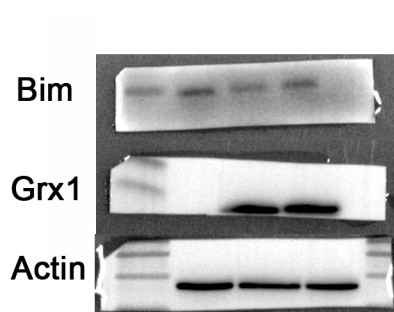

Figure 5B

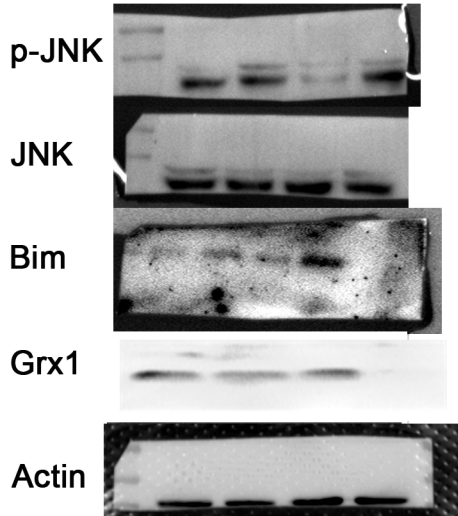

Figure 5C

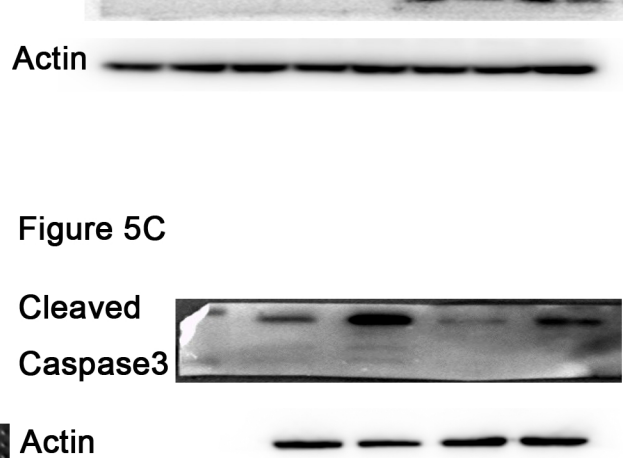

Supplement: 41598_2017_15672_MOESM1_ESM.pdf [file 41598_2017_15672_MOESM1_ESM.pdf]
